# Supplementary material for: Dynamics of effusive and diffusive gas separation on pillared graphene
Source: Royal Society of Chemistry journal article supplement (doi:10.1039/c6cp02392d), 2016-01-01
Supplement: c6cp02392d3.pdf [file c6cp02392d3.pdf]

**Supporting information for:**  
**Dynamics of effusive and diffusive gas separation**  
**on pillared graphene.**

Radosław P. Wesółowski and Artur P. Terzyk\*

*Faculty of Chemistry, Physicochemistry of Carbon Materials Research Group, Nicolaus  
Copernicus University, Gagarina 7, 87-100 Toruń, Poland*

E-mail: [aterzyk@chem.umk.pl](mailto:aterzyk@chem.umk.pl)

Phone: +48 56 611 4371. Fax: (+48) 56 654 24 77

Files available free of charge:

- [movie\\_1.avi](#) - Influence of parameter  $\lambda$  value on separation of  $O_2$  from  $N_2$ .
- [movie\\_2.avi](#) Separation of  $H_2$ ,  $CH_4$  and  $CO_2$  with use of hybrid (6,6)-(5,5) 2-D pillared graphene.

Nitrogen, TRIPOS FF, 5 ns

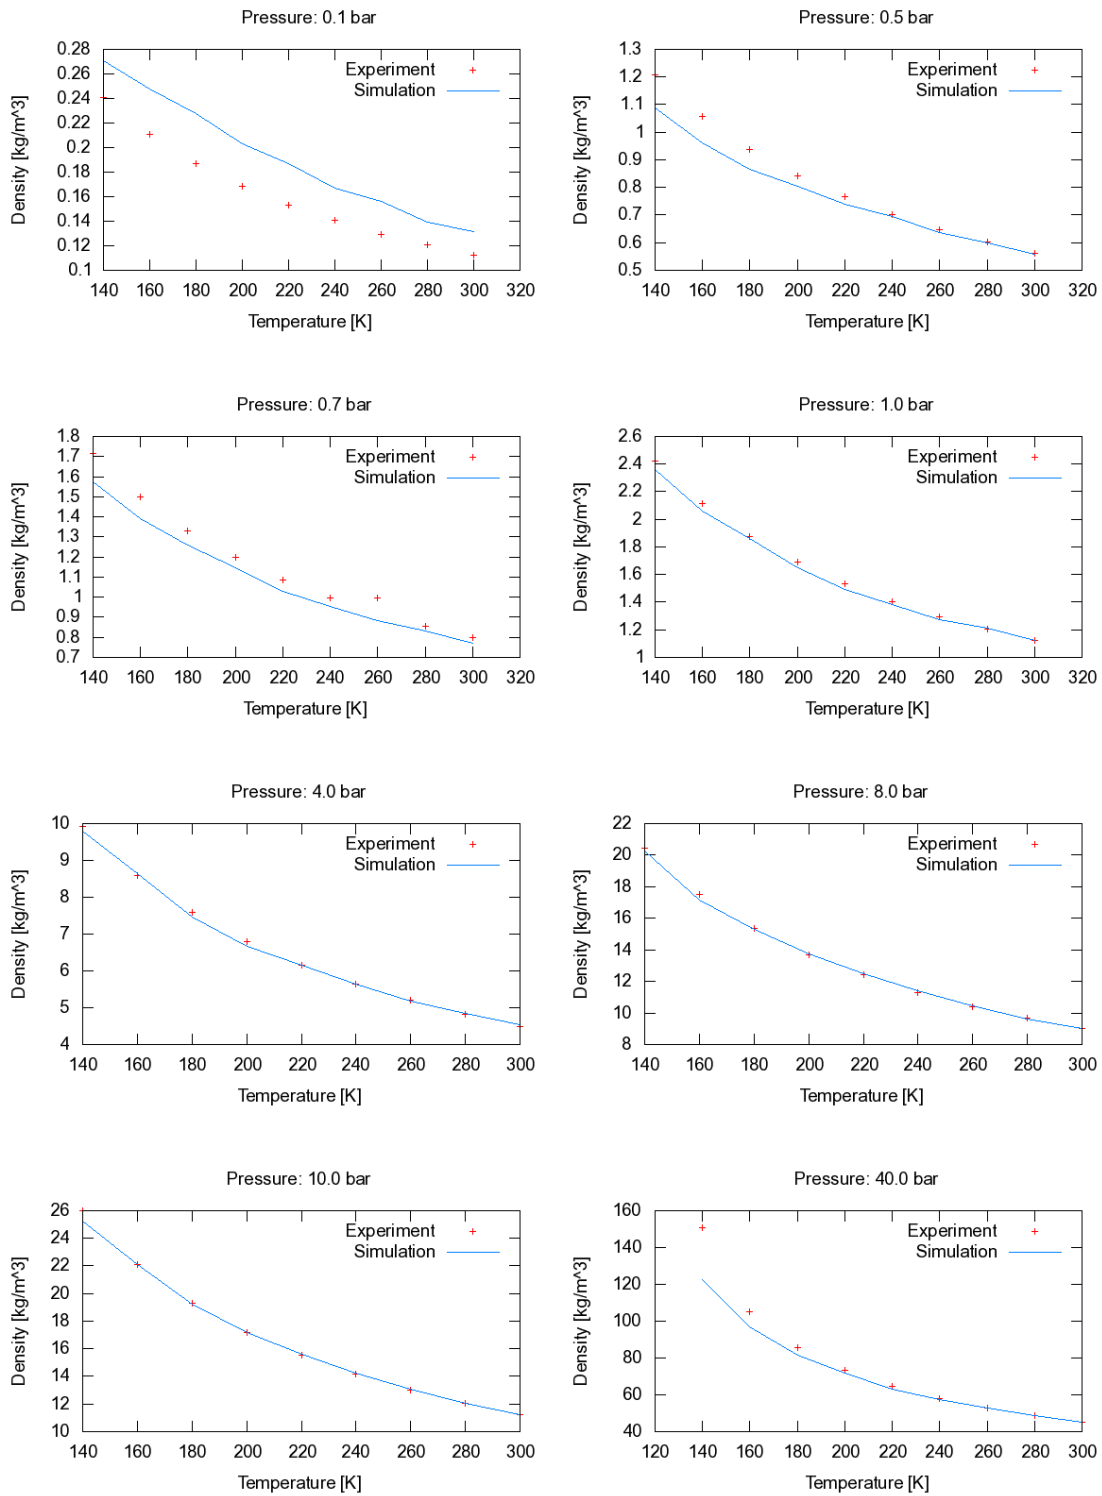

Figure S1: Verification of force field parameters against experimental data - nitrogen.

Oxygen, TRIPOS FF, 5 ns

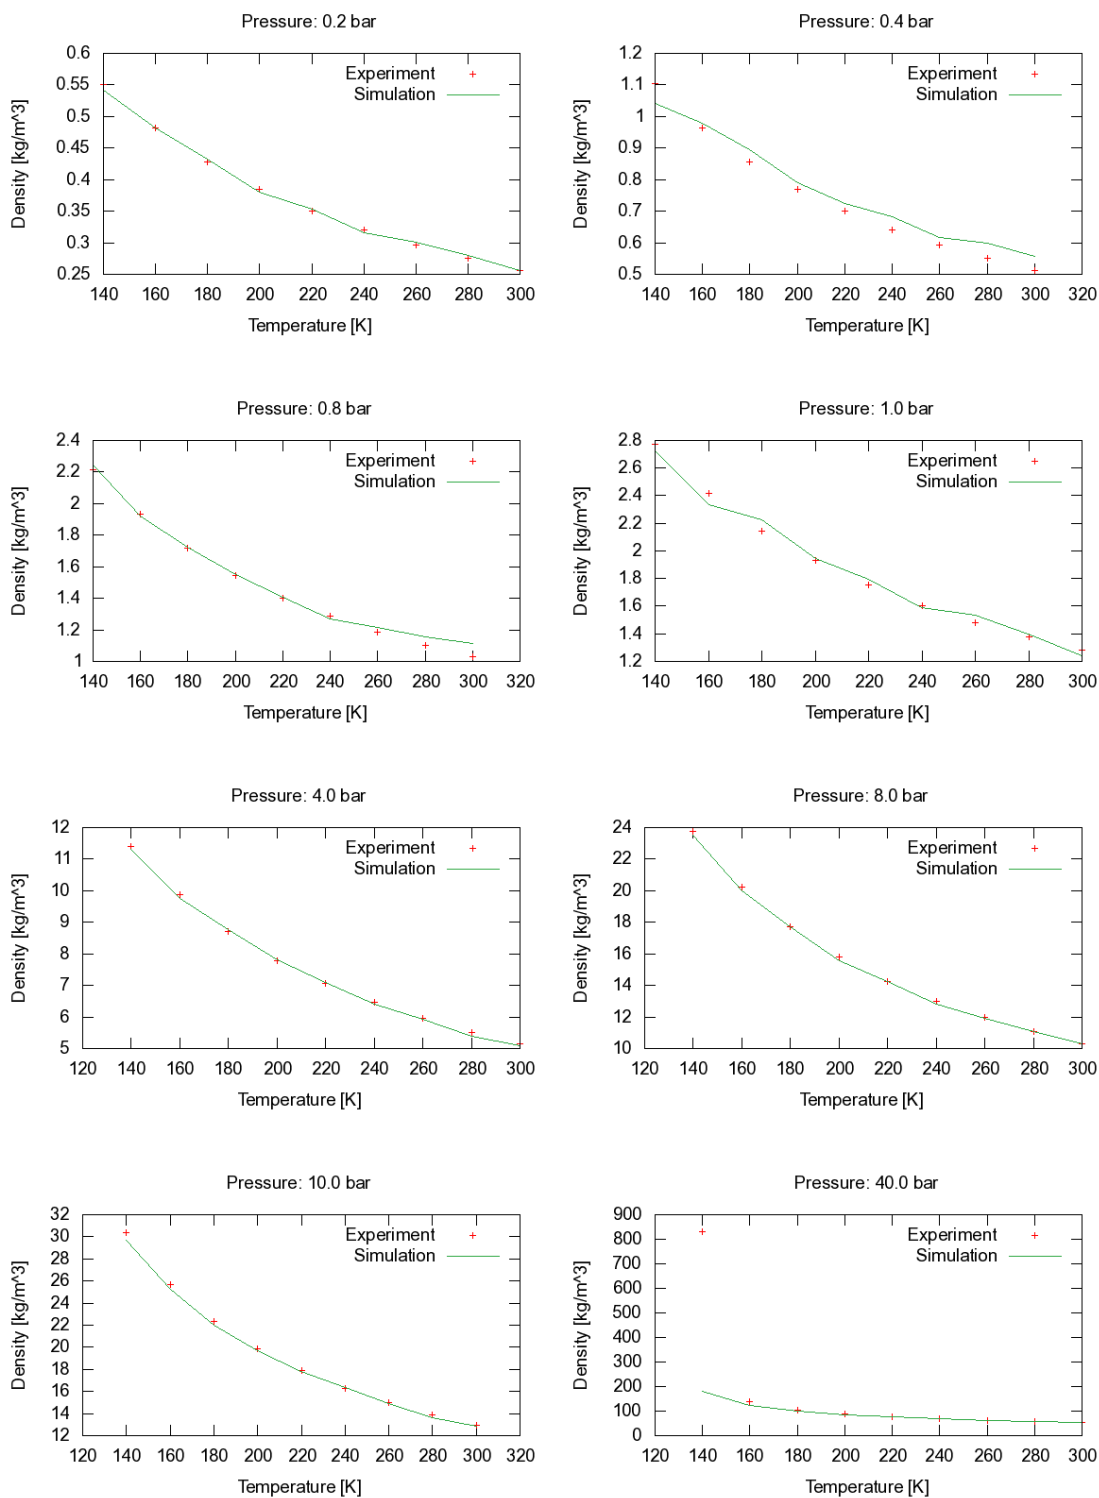

Figure S2: Verification of force field parameters against experimental data - oxygen.

Air (79/21), TRIPOS FF, 5 ns

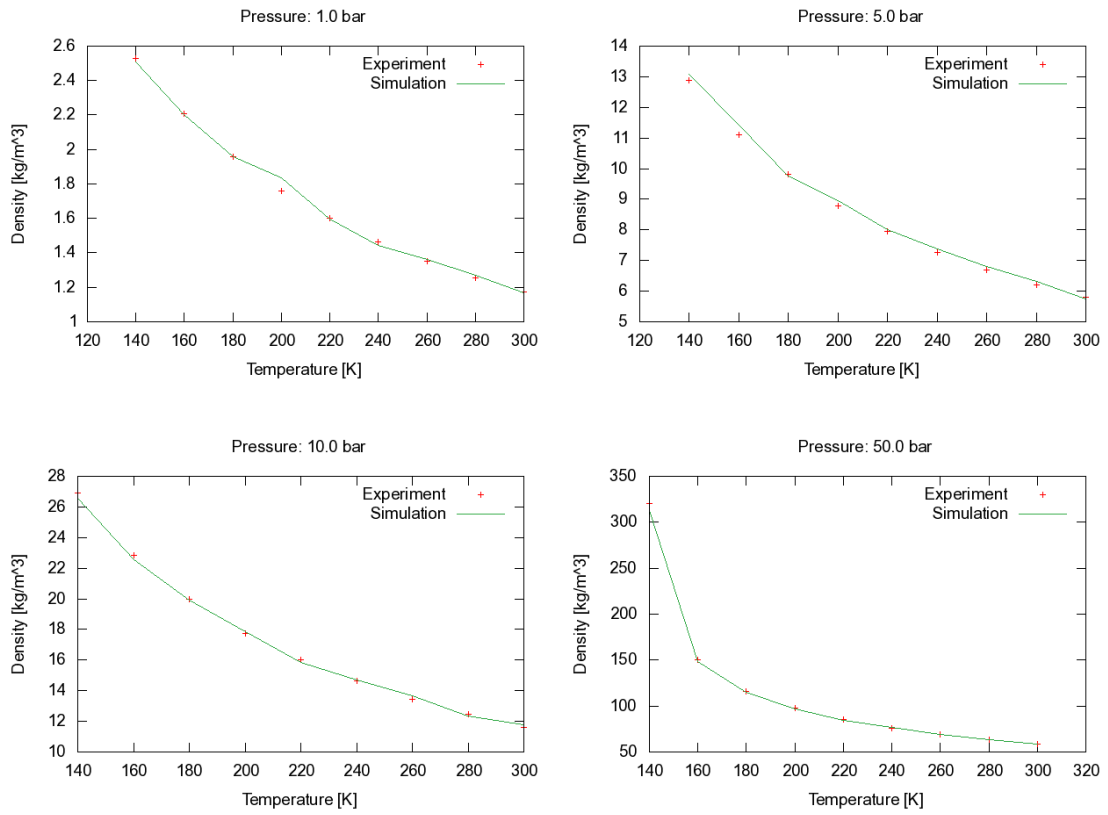

Figure S3: Verification of force field parameters against experimental data - air.

Methane, TRIPOS FF, 5 ns

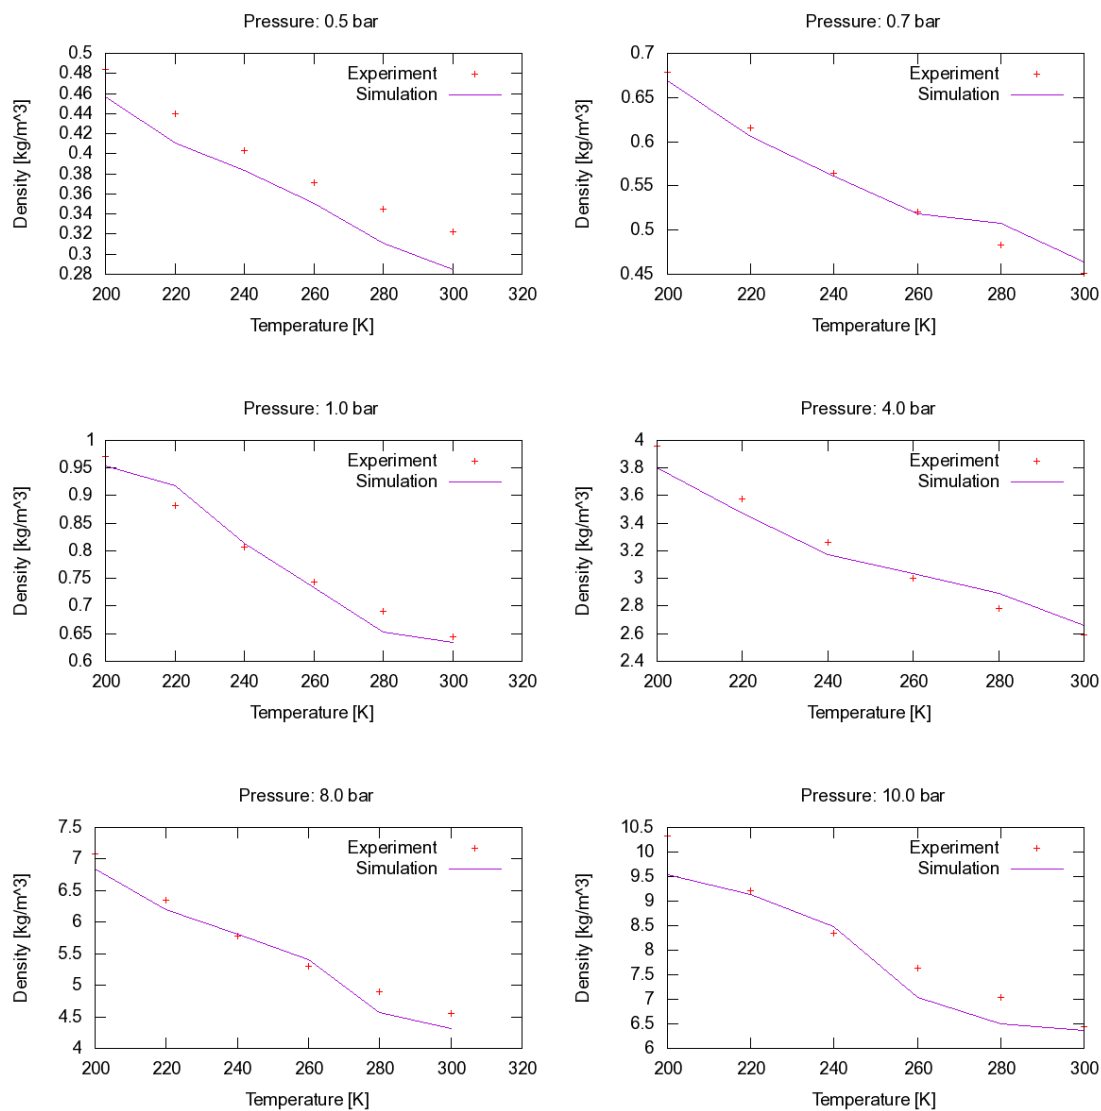

Figure S4: Verification of force field parameters against experimental data - methane.

Carbon dioxide, TRIPOS FF, 5 ns

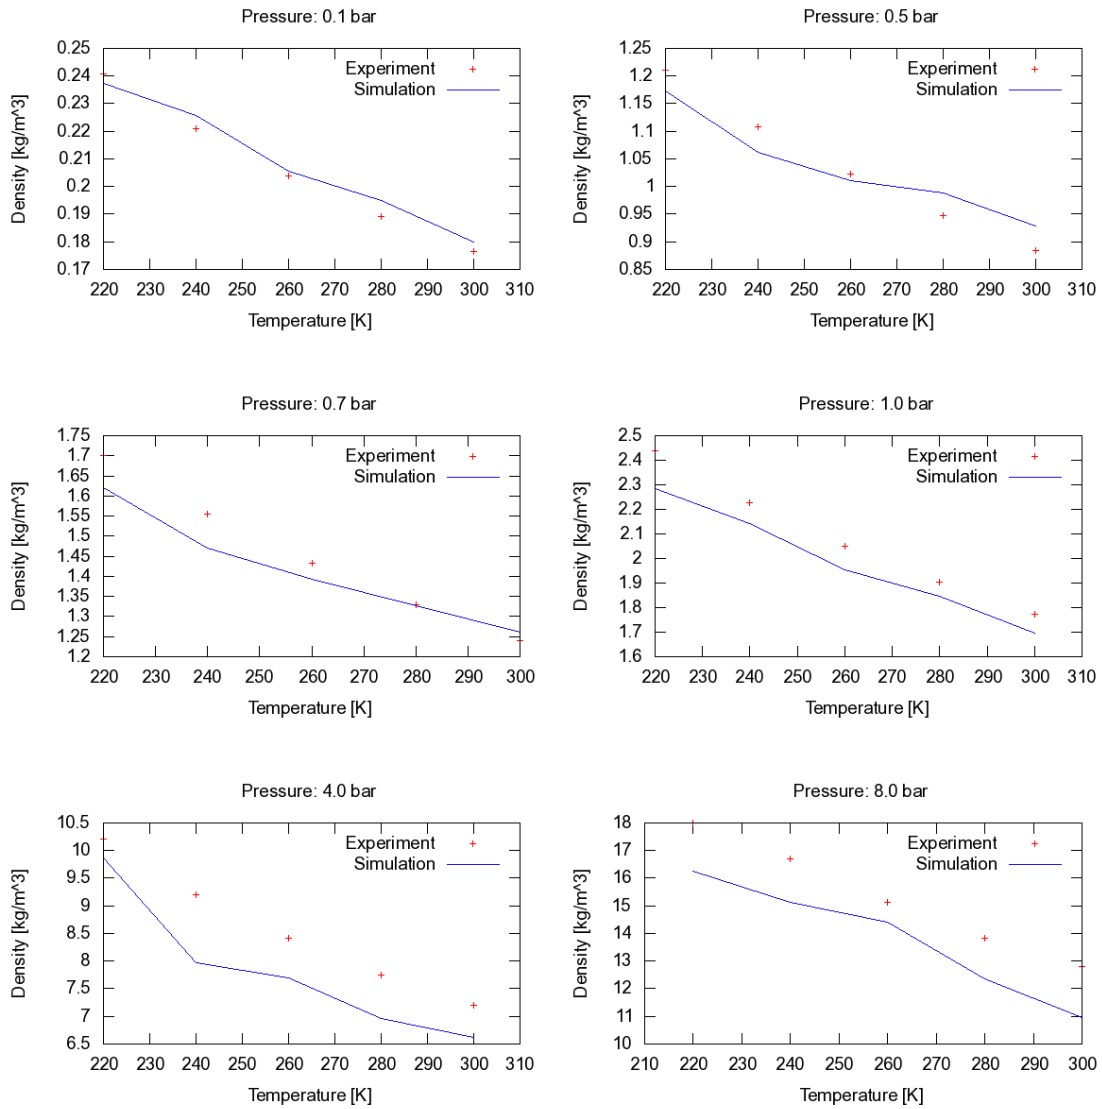

Figure S5: Verification of force field parameters against experimental data - carbon dioxide.

Hydrogen, TRIPOS FF, 5 ns

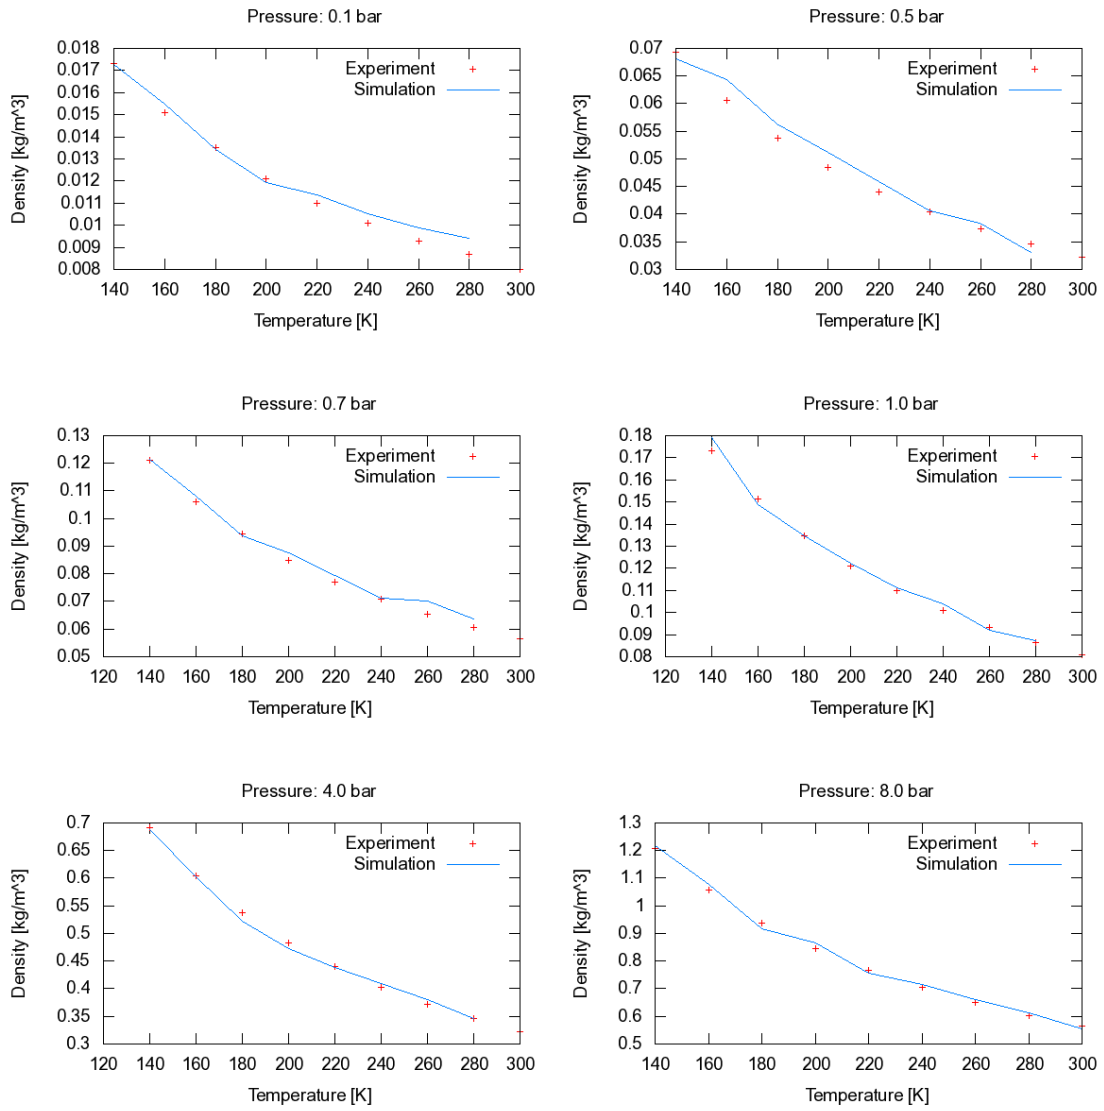

Figure S6: Verification of force field parameters against experimental data - hydrogen.
